# Supplementary material
Source: PubMed Central journal article supplement (PMC6105559)
Supplement: NIHMS984259-supplement-Appendix.pdf [file NIHMS984259-supplement-Appendix.pdf]

**Appendix I: Primary Care Obesity Resource Survey**

The first set of questions asks about how often you use certain resources and how helpful they are to you when managing obesity (BMI >95<sup>th</sup> percentile) in your practice.

| 1. How often do you currently use this resource during a clinic visit when caring for patients with obesity? | Never | Rarely | Sometimes | Often | Always |
|--------------------------------------------------------------------------------------------------------------|-------|--------|-----------|-------|--------|
| EHR smart tool for obesity                                                                                   |       |        |           |       |        |
| EHR discharge instructions for obesity                                                                       |       |        |           |       |        |
| Educational handouts to help patients manage weight                                                          |       |        |           |       |        |
| Educational nutrition props (portioned plates, measuring cups, etc.)                                         |       |        |           |       |        |
| Websites to help patients manage weight                                                                      |       |        |           |       |        |
| Mobile apps to help patients manage weight                                                                   |       |        |           |       |        |
| Other resources (please list):                                                                               |       |        |           |       |        |

| 2. How often do you currently refer your patients with obesity to ...   | Never | Rarely | Sometimes | Often | Always |
|-------------------------------------------------------------------------|-------|--------|-----------|-------|--------|
| A dietitian/nutritionist                                                |       |        |           |       |        |
| A behavioral health specialist or psychologist                          |       |        |           |       |        |
| A social worker or case manager                                         |       |        |           |       |        |
| A community exercise program                                            |       |        |           |       |        |
| The Nemours Weight Management Clinic (or Nemours Healthy Weight Clinic) |       |        |           |       |        |
| Another weight management program                                       |       |        |           |       |        |
| Other (please list):                                                    |       |        |           |       |        |

| 3. In your current practice, how helpful is this resource to you in providing care to children with obesity? | Very unhelpful | Somewhat unhelpful | Neither unhelpful or helpful | Somewhat helpful | Very helpful |
|--------------------------------------------------------------------------------------------------------------|----------------|--------------------|------------------------------|------------------|--------------|
| EHR smart tool for obesity                                                                                   |                |                    |                              |                  |              |
| EHR discharge instructions for obesity                                                                       |                |                    |                              |                  |              |
| Educational handouts to help patients manage weight                                                          |                |                    |                              |                  |              |
| Educational nutrition props (portioned plates, measuring cups, etc.)                                         |                |                    |                              |                  |              |
| Websites to help patients manage weight                                                                      |                |                    |                              |                  |              |
| Mobile apps to help patients manage weight                                                                   |                |                    |                              |                  |              |
| Dietitian/nutritionist                                                                                       |                |                    |                              |                  |              |
| Behavioral health specialist or psychologist                                                                 |                |                    |                              |                  |              |
| Social worker or case manager                                                                                |                |                    |                              |                  |              |
| Community exercise program                                                                                   |                |                    |                              |                  |              |
| The Nemours Weight Management Clinic (or Nemours Healthy Weight Clinic)                                      |                |                    |                              |                  |              |
| Another weight management program                                                                            |                |                    |                              |                  |              |
| Other resources (please list):                                                                               |                |                    |                              |                  |              |

Please let us know how strongly you agree with each of the following statements.

| 4. I feel that this is a barrier to providing effective obesity care in our practice ... | Strongly disagree | Disagree | Neither agree or disagree | Agree | Strongly agree |
|------------------------------------------------------------------------------------------|-------------------|----------|---------------------------|-------|----------------|
| Time constraints during well visits                                                      |                   |          |                           |       |                |
| Scheduling access for obesity-specific visits                                            |                   |          |                           |       |                |
| Lack of patient educational materials in English                                         |                   |          |                           |       |                |
| Lack of patient education materials that are culturally or linguistically sensitive      |                   |          |                           |       |                |
| Poor physician reimbursement                                                             |                   |          |                           |       |                |
| Poor non-physician reimbursement                                                         |                   |          |                           |       |                |
| Lack of ancillary staff to assist with obesity management                                |                   |          |                           |       |                |
| Lack of administrative or organizational support                                         |                   |          |                           |       |                |
| Other barriers (please list):                                                            |                   |          |                           |       |                |

Finally, we would like to know what new resources if integrated into your practice would help you to manage obesity in your patient population.

| 5. Integrating this new resource in my practice would help me to deliver better care to children with obesity ... | Strongly disagree | Disagree | Neither agree or disagree | Agree | Strongly agree | Already Have |
|-------------------------------------------------------------------------------------------------------------------|-------------------|----------|---------------------------|-------|----------------|--------------|
| On-site dietitian/nutritionist                                                                                    |                   |          |                           |       |                |              |
| On-site exercise specialist                                                                                       |                   |          |                           |       |                |              |
| On-site behavioral health specialist or psychologist                                                              |                   |          |                           |       |                |              |
| On-site social worker                                                                                             |                   |          |                           |       |                |              |
| Telehealth connection to the weight management team                                                               |                   |          |                           |       |                |              |
| Health coach                                                                                                      |                   |          |                           |       |                |              |
| Patient educational materials                                                                                     |                   |          |                           |       |                |              |
| Patient education materials that are culturally and linguistically sensitive                                      |                   |          |                           |       |                |              |
| Information about community resources                                                                             |                   |          |                           |       |                |              |
| Electronic dashboard for physicians to track weight and goals                                                     |                   |          |                           |       |                |              |
| Electronic portal for patients to track weight and goals                                                          |                   |          |                           |       |                |              |
| Other resources (please list):                                                                                    |                   |          |                           |       |                |              |

| 6. How often would you provide this new resource to your patients with obesity if it was integrated within your practice? | Never | Rarely | Sometimes | Often | Always |
|---------------------------------------------------------------------------------------------------------------------------|-------|--------|-----------|-------|--------|
| On-site dietitian/nutritionist                                                                                            |       |        |           |       |        |
| On-site exercise specialist                                                                                               |       |        |           |       |        |
| On-site behavioral health specialist or psychologist                                                                      |       |        |           |       |        |
| On-site social worker or case manager                                                                                     |       |        |           |       |        |
| Telehealth connection to the weight management team                                                                       |       |        |           |       |        |
| Health coach                                                                                                              |       |        |           |       |        |
| Patient educational materials                                                                                             |       |        |           |       |        |
| Patient education materials that are culturally and linguistically sensitive                                              |       |        |           |       |        |
| Information about community resources                                                                                     |       |        |           |       |        |
| Electronic dashboard for physicians to track weight and goals                                                             |       |        |           |       |        |
| Electronic portal for patients to track weight and goals                                                                  |       |        |           |       |        |
| Other resources (please list):                                                                                            |       |        |           |       |        |
